# Supplementary material
Source: publisher figshare collection journal article supplement (https://acs.figshare.com/ndownloader/files/4253095)
Supplement: Supplementary file 1 [file 4253095]

Supplementary Tables 1 and 2 show the individual weights of the energy terms obtained during the five way cross validation, and the averaged energy function used during benchmarking. The 5 weights obtained for the Solvation free energy potential and the NV environment KBP were averaged, and the average value shows a relatively low standard deviation. As seen in supplementary table 2, the standard deviations of the averaged reference energies were significantly higher. This is to be expected as the space of possible reference energies is much larger. Due to these large standard deviations, the reference energies were reoptimized rather than averaged in the final NV environment KBP energy function.

**Supplementary Table 1: Energy function weights for the NV environment KBP**

|                  |                            |                                          | Five way cross validation sets |       |       |       |       |       |                       |
|------------------|----------------------------|------------------------------------------|--------------------------------|-------|-------|-------|-------|-------|-----------------------|
|                  | ROSETTA<br>Scoring<br>term | Scoring tterm description                | 1                              | 2     | 3     | 4     | 5     | Mean  | Standard<br>Deviation |
| Free<br>weights  | fa_sol                     | Solvation Free energy Potential          | 0.558                          | 0.569 | 0.563 | 0.547 | 0.585 | 0.564 | 0.014                 |
|                  | neigh_vect                 | NV environment KBP                       | 1.025                          | 1.013 | 0.996 | 1.059 | 0.978 | 1.014 | 0.030                 |
| Fixed<br>weights | fa_atr                     | Attractive force                         | 0.800                          |       |       |       |       | 0.800 | 0.000                 |
|                  | fa_rep                     | Repulsive force                          | 0.440                          |       |       |       |       | 0.440 | 0.000                 |
|                  | fa_intra_rep               | Intra-residue repulsive force            | 0.004                          |       |       |       |       | 0.004 | 0.000                 |
|                  | pro_close                  | Proline closure bonus                    | 1.000                          |       |       |       |       | 1.000 | 0.000                 |
|                  | fa_pair                    | Pair energy                              | 0.490                          |       |       |       |       | 0.490 | 0.000                 |
|                  | hbond_sr_bb                | Hydrogen bonding: short range backbone   | 0.5850                         |       |       |       |       | 0.585 | 0.000                 |
|                  | hbond_lr_bb                | Hydrogen bonding: long range backbone    | 1.170                          |       |       |       |       | 1.170 | 0.000                 |
|                  | hbond_bb_sc                | Hydrogren bonding: backbone-sidechain    | 1.170                          |       |       |       |       | 1.170 | 0.000                 |
|                  | hbond_sc                   | Hydrogen bonding: sidechain-sidechain    | 1.100                          |       |       |       |       | 1.100 | 0.000                 |
|                  | dsIf_ss_dst                | Disulfide sidechain distance             | 1.000                          |       |       |       |       | 1.000 | 0.000                 |
|                  | dsIf_cs_ang                | Disulfide cystine sulfur angle           | 1.000                          |       |       |       |       | 1.000 | 0.000                 |
|                  | dsIf_ss_dih                | Disulfide sidechain-sidechain dihedral   | 1.000                          |       |       |       |       | 1.000 | 0.000                 |
|                  | dsIf_ca_dih                | Disulfide C $\alpha$ -sidechain dihedral | 1.000                          |       |       |       |       | 1.000 | 0.000                 |
|                  | rama                       | Ramachandran score                       | 0.200                          |       |       |       |       | 0.200 | 0.000                 |
|                  | omega                      | Omega angle score                        | 0.500                          |       |       |       |       | 0.500 | 0.000                 |
|                  | p_aa_pp                    | Probability of an a                      | 0.320                          |       |       |       |       | 0.320 | 0.000                 |
|                  | fa_dun                     | dunbrack rotamer library                 | 0.560                          |       |       |       |       | 0.560 | 0.000                 |

**Supplementary Table 2: Reference energy weights for the NV environment KBP**

| Amino Acid | Five way cross validation sets |        |        |        |        |         |                    |                       |
|------------|--------------------------------|--------|--------|--------|--------|---------|--------------------|-----------------------|
|            | 1                              | 2      | 3      | 4      | 5      | Mean    | Standard Deviation | Re-optimized Energies |
| A          | -0.313                         | -0.345 | -0.332 | -0.299 | -0.311 | -0.320  | 0.018              | -0.280                |
| C          | -0.186                         | -0.267 | -0.251 | -0.203 | -0.273 | -0.236  | 0.039              | -0.191                |
| D          | -0.051                         | -0.152 | -0.117 | -0.045 | -0.158 | -0.105  | 0.053              | -0.089                |
| E          | -0.116                         | -0.225 | -0.221 | -0.134 | -0.230 | -0.185  | 0.055              | -0.163                |
| F          | 0.979                          | 1.008  | 1.098  | 0.976  | 1.035  | 1.019   | 0.050              | 1.002                 |
| G          | 0.187                          | 0.862  | 0.681  | 0.322  | 0.952  | 0.601   | 0.334              | 0.318                 |
| H          | 0.773                          | 0.727  | 0.727  | 0.755  | 0.683  | 0.733   | 0.034              | 0.738                 |
| I          | -0.087                         | -0.063 | -0.066 | -0.147 | -0.034 | -0.079  | 0.041              | -0.089                |
| K          | -0.035                         | -0.113 | -0.125 | -0.046 | -0.104 | -0.085  | 0.041              | -0.056                |
| L          | -0.288                         | -0.27  | -0.302 | -0.350 | -0.286 | -0.301  | 0.029              | -0.295                |
| M          | -0.475                         | -0.472 | -0.532 | -0.514 | -0.478 | -0.494  | 0.027              | -0.488                |
| N          | -0.523                         | -0.559 | -0.549 | -0.500 | -0.582 | -0.543  | 0.031              | -0.532                |
| P          | -0.486                         | -0.556 | -0.579 | -0.488 | -0.551 | -0.532  | 0.042              | -0.494                |
| Q          | -0.481                         | -0.582 | -0.554 | -0.491 | -0.569 | -0.536  | 0.046              | -0.497                |
| R          | -0.280                         | -0.364 | -0.324 | -0.255 | -0.389 | -0.322  | 0.055              | -0.294                |
| S          | -0.396                         | -0.436 | -0.438 | -0.373 | -0.437 | -0.416  | 0.029              | -0.393                |
| T          | -0.312                         | -0.375 | -0.373 | -0.307 | -0.368 | -0.347  | 0.034              | -0.332                |
| V          | -0.175                         | -0.166 | -0.166 | -0.217 | -0.134 | -0.1720 | 0.029              | -0.176                |
| W          | 1.430                          | 1.505  | 1.529  | 1.469  | 1.426  | 1.472   | 0.045              | 1.474                 |
| Y          | 0.842                          | 0.853  | 0.902  | 0.851  | 0.815  | 0.853   | 0.031              | 0.842                 |

Supplementary Tables 3 and 4 show the standard deviations of PSSM and Sequence Recovery values produced by all 5 scoring functions generated by the 5 way cross validation. Comparison of the standard deviations with observed improvements in PSSM and sequence recovery suggests that recovery improvements greater than 1% are likely statistically significant.

**Supplementary Table 3: Standard deviations for 100 protein benchmark set data**

|          | Percent PSSM Recovery |                    | Percent Sequence Recovery |                    |
|----------|-----------------------|--------------------|---------------------------|--------------------|
|          | Reference             | NV environment KBP | Reference                 | NV Environment KBP |
| Buried   | 0.4%                  | 0.3%               | 0.8%                      | 0.2%               |
| Boundary | 0.6%                  | 0.8%               | 0.3%                      | 0.5%               |
| Surface  | 0.4%                  | 0.2%               | 0.4%                      | 0.1%               |
| Overall  | 0.2%                  | 0.1%               | 0.3%                      | 0.1%               |

**Supplementary Table 4: Standard deviations for 42 protein benchmark set data**

|          | Percent PSSM Recovery |                    | Percent Sequence Recovery |                    |
|----------|-----------------------|--------------------|---------------------------|--------------------|
|          | Reference             | NV environment KBP | Reference                 | NV environment KBP |
| Buried   | 0.7%                  | 0.5%               | 1.2%                      | 0.6%               |
| Boundary | 0.7%                  | 0.5%               | 0.3%                      | 0.6%               |
| Surface  | 0.3%                  | 0.4%               | 0.4%                      | 0.4%               |
| Overall  | 0.2%                  | 0.3%               | 0.5%                      | 0.3%               |
